# Supplementary material for: Towards a Mathematical Theory of Cortical Micro-circuits
Source: PubMed Central journal article supplement (PMC2749218; doi:10.1371/journal.pcbi.1000532), 2009-10-09

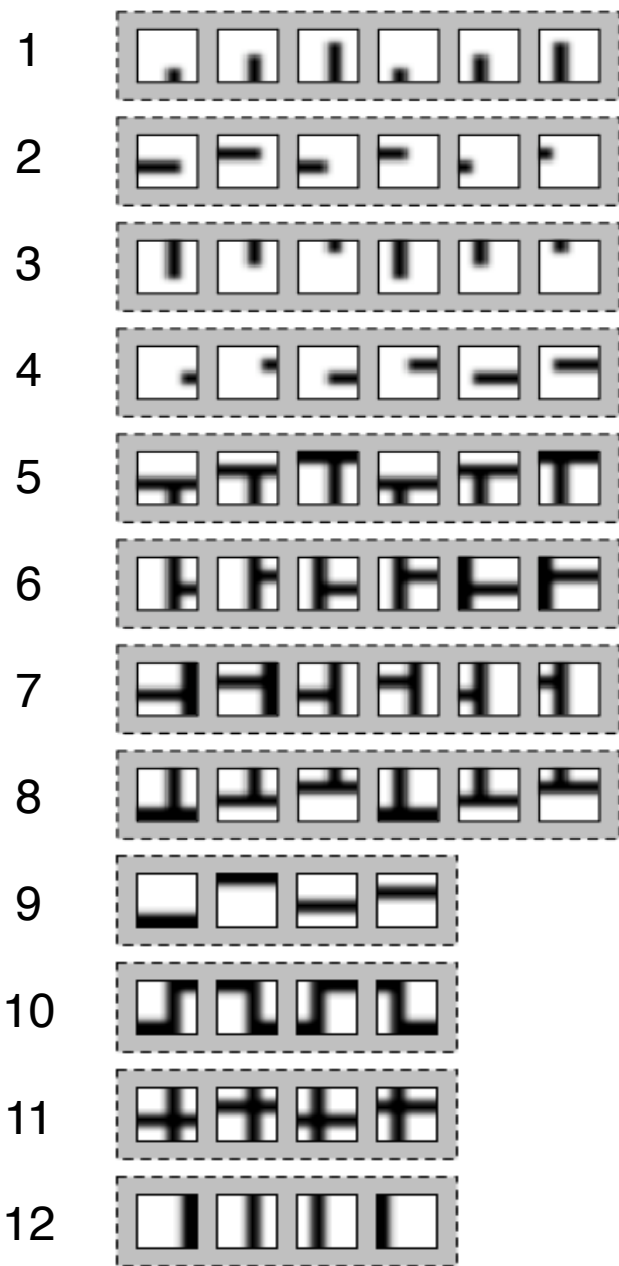

Supplement: pcbi.1000532.s004.pdf [file pcbi.1000532.s004.pdf]
